# Supplementary material
Source: PubMed Central journal article supplement (PMC3320947)

**Supplemental Table S1: Primer Sequences.** The primer sequences used to amplify the 2.1kb AQP4 M1 promoter is given below. The primers used to create the miR-130a and miR-1280 recognition site mutants are also listed below. The miRNA recognition site was mutated by changing several of the nucleotides within the seed region. The mutated nucleotides are underlined.

| Primers                  | Sequence                                                      |
|--------------------------|---------------------------------------------------------------|
| <b>AQP4 M1 promoter</b>  | Forward: 5' CCCTGGTCAATTTTAAGCTACTCTGC 3'                     |
|                          | Reverse: 5' TCATGCCTCCCCAGCCAGA 3'                            |
| <b>miR-130a mutation</b> | Forward: 5' ACCAAGGTGTCCTGCATTCATT <u>CCTACAGTGGACCA</u> 3'   |
|                          | Reverse: 5' TGGTCC <u>ACTGTAGGA</u> AATGAATGCAGGACACCTTGGT 3' |
| <b>miR-1280 mutation</b> | Forward: 5' TCTAGATGTTTTGT <u>AGAGTAATGTTTT</u> CATAGAT 3'    |
|                          | Reverse: 5' ATCTATGAAA <u>ACATTACTCTACA</u> AAACATCTAGA 3'    |

**Supplemental Table S2:** miRNA profiling of astrocytoma cells. 1µg of total astrocytoma RNA was used to profile miRNA expression. A total of 293 miRNAs were detected. miRNAs are listed based on average signal intensity in ascending order. Raw signal intensities were averaged to provide average signal intensity values. miRNAs predicted to target the AQP4 M1 promoter are highlighted in grey.

| miRNA           | Average Signal Intensity | miRNA           | Average Signal Intensity |
|-----------------|--------------------------|-----------------|--------------------------|
| hsa-miR-664     | 318.625                  | hsa-miR-18a     | 721.75                   |
| hsa-miR-502-5p  | 322.75                   | hsa-miR-412     | 729                      |
| hsa-miR-190     | 358.25                   | hsa-miR-551b*   | 760                      |
| hsa-miR-551a    | 397.75                   | hsa-miR-488     | 767.25                   |
| hsa-miR-145*    | 415.5                    | hsa-miR-203     | 768.125                  |
| hsa-let-7f-2*   | 435.25                   | hsa-miR-29a*    | 794.625                  |
| hsa-miR-652     | 443.75                   | hsa-miR-409-3p  | 804                      |
| hsa-miR-550*    | 450.125                  | hsa-miR-519c-5p | 820.375                  |
| hsa-miR-16-1*   | 452                      | hsa-miR-1297    | 867.375                  |
| hsa-miR-622     | 457.75                   | hsa-miR-636     | 883.5                    |
| hsa-miR-450a    | 477.375                  | hsa-miR-16-2*   | 899.625                  |
| hsa-miR-656     | 485.75                   | hsa-miR-337-5p  | 901.375                  |
| hsa-miR-769-5p  | 485.875                  | hsa-let-7d*     | 903                      |
| hsa-miR-510     | 512.5                    | hsa-miR-553     | 906.25                   |
| hsa-miR-339-3p  | 520.625                  | hsa-miR-601     | 911                      |
| hsa-miR-196a    | 536.625                  | hsa-miR-490-3p  | 918.125                  |
| hsa-miR-1301    | 537.75                   | hsa-miR-122*    | 918.5                    |
| hsa-miR-200c*   | 539                      | hsa-miR-1270    | 925.125                  |
| hsa-miR-200b*   | 546.25                   | hsa-miR-345     | 929.625                  |
| hsa-miR-379     | 568.375                  | hsa-miR-602     | 946.875                  |
| hsa-miR-1184    | 568.625                  | hsa-miR-744     | 956.125                  |
| hsa-miR-18b     | 587.375                  | hsa-miR-99a*    | 981.875                  |
| hsa-miR-218     | 600                      | hsa-miR-520d-5p | 983.875                  |
| hsa-miR-125b-2* | 603.75                   | hsa-miR-186     | 1022.375                 |
| hsa-miR-29b-1*  | 614.875                  | hsa-miR-337-3p  | 1042                     |
| hsa-miR-513b    | 633                      | hsa-miR-149     | 1051.625                 |
| hsa-miR-1273    | 646.5                    | hsa-miR-483-5p  | 1071.625                 |
| hsa-miR-376a*   | 654.25                   | hsa-miR-138-2*  | 1097.375                 |
| hsa-miR-124     | 657.125                  | hsa-miR-874     | 1116.125                 |
| hsa-miR-497     | 662                      | hsa-miR-629     | 1142.125                 |
| hsa-miR-127-3p  | 675.875                  | hsa-miR-198     | 1173.25                  |
| hsa-miR-411     | 680.75                   | hsa-miR-508-5p  | 1182.5                   |
| hsa-miR-181a*   | 700.625                  | hsa-miR-548e    | 1187.5                   |
| hsa-miR-220b    | 701.875                  | hsa-miR-654-3p  | 1197.5                   |
| hsa-miR-615-3p  | 714                      | hsa-miR-1248    | 1222.25                  |
| hsa-miR-938     | 721.5                    | hsa-miR-625*    | 1236.875                 |

| miRNA           | Average Signal Intensity | miRNA           | Average Signal Intensity |
|-----------------|--------------------------|-----------------|--------------------------|
| hsa-miR-206     | 1256.25                  | hsa-miR-647     | 2173.5                   |
| hsa-miR-302c*   | 1292                     | hsa-miR-920     | 2181.625                 |
| hsa-miR-185*    | 1336.625                 | hsa-miR-30e*    | 2216.5                   |
| hsa-miR-1275    | 1337.375                 | hsa-miR-542-3p  | 2271                     |
| hsa-miR-659     | 1356.375                 | hsa-miR-148b    | 2275                     |
| hsa-miR-370     | 1358.125                 | hsa-miR-146b-3p | 2284.25                  |
| hsa-miR-1258    | 1381.125                 | hsa-miR-625     | 2295.25                  |
| hsa-miR-92b     | 1387.25                  | hsa-miR-934     | 2364.625                 |
| hsa-miR-197     | 1388.5                   | hsa-miR-1284    | 2387.25                  |
| hsa-miR-140-5p  | 1414.125                 | hsa-miR-129*    | 2405                     |
| hsa-miR-493*    | 1425.5                   | hsa-miR-342-3p  | 2459.375                 |
| hsa-miR-671-5p  | 1428.25                  | hsa-miR-505*    | 2461.5                   |
| hsa-miR-129-5p  | 1451.625                 | hsa-miR-299-3p  | 2598.375                 |
| hsa-miR-597     | 1462.625                 | hsa-miR-10b     | 2634                     |
| hsa-miR-193b*   | 1467.875                 | hsa-miR-28-5p   | 2636.25                  |
| hsa-miR-106b*   | 1518                     | hsa-miR-1260    | 2684.625                 |
| hsa-miR-877     | 1521.625                 | hsa-miR-584     | 2776.625                 |
| hsa-miR-664*    | 1553.375                 | hsa-miR-340*    | 2790.5                   |
| hsa-miR-629*    | 1561.625                 | hsa-miR-376c    | 2801.375                 |
| hsa-miR-887     | 1600                     | hsa-let-7b*     | 2833.25                  |
| hsa-miR-1261    | 1614.125                 | hsa-miR-210     | 2856.25                  |
| hsa-miR-525-5p  | 1640                     | hsa-miR-98      | 2858.875                 |
| hsa-miR-381     | 1671                     | hsa-miR-374b    | 2870.25                  |
| hsa-miR-23a*    | 1696.5                   | hsa-miR-516b    | 2886.25                  |
| hsa-miR-21*     | 1710.125                 | hsa-miR-642     | 2917                     |
| hsa-miR-630     | 1711.875                 | hsa-miR-145     | 2995.875                 |
| hsa-miR-425     | 1718.25                  | hsa-miR-1304    | 3031                     |
| hsa-miR-422a    | 1734.25                  | hsa-miR-106b    | 3079.375                 |
| hsa-miR-375     | 1778.75                  | hsa-miR-99b*    | 3135.125                 |
| hsa-miR-485-3p  | 1798                     | hsa-miR-301a    | 3162.75                  |
| hsa-miR-187*    | 1802.125                 | hsa-miR-382     | 3460.375                 |
| hsa-miR-181b    | 1834.5                   | hsa-miR-634     | 3504                     |
| hsa-miR-576-5p  | 1836.75                  | hsa-miR-331-3p  | 3509.375                 |
| hsa-miR-183     | 1897.375                 | hsa-miR-1299    | 3518                     |
| hsa-miR-107     | 1899.75                  | hsa-miR-152     | 3527.75                  |
| hsa-miR-214     | 1966                     | hsa-miR-518a-5p | 3606.75                  |
| hsa-miR-298     | 1984.75                  | hsa-miR-151-3p  | 3623.25                  |
| hsa-miR-221*    | 2067.25                  | hsa-miR-17      | 3626.625                 |
| hsa-miR-516a-5p | 2072.875                 | hsa-miR-374b*   | 3631.875                 |
| hsa-miR-1300    | 2075.625                 | hsa-miR-130b    | 3725.375                 |
| hsa-miR-185     | 2086.5                   | hsa-miR-509-5p  | 3736.125                 |
| hsa-miR-7       | 2140.375                 | hsa-miR-29c     | 3806                     |

| miRNA           | Average Signal Intensity | miRNA           | Average Signal Intensity |
|-----------------|--------------------------|-----------------|--------------------------|
| hsa-miR-125b-1* | 3862.25                  | hsa-miR-513a-5p | 9050.125                 |
| hsa-miR-22*     | 3903                     | hsa-miR-320c    | 9393.125                 |
| hsa-miR-140-3p  | 3908.375                 | hsa-miR-519e    | 9467                     |
| hsa-miR-208a    | 3954.625                 | hsa-miR-320a    | 9486.875                 |
| hsa-miR-363*    | 4188.5                   | hsa-miR-191     | 9639.625                 |
| hsa-miR-151-5p  | 4251.875                 | hsa-miR-628-3p  | 9833.375                 |
| hsa-miR-574-3p  | 4519                     | hsa-miR-365     | 9864                     |
| hsa-miR-377     | 4634.625                 | hsa-miR-424     | 10036.25                 |
| hsa-miR-708     | 4635                     | hsa-miR-576-3p  | 10528.75                 |
| hsa-miR-378     | 4688.5                   | hsa-miR-30e     | 10640.63                 |
| hsa-miR-196b    | 4864.625                 | hsa-miR-184     | 10822.63                 |
| hsa-miR-101     | 4918.125                 | hsa-miR-549     | 11173.75                 |
| hsa-miR-25*     | 5011.75                  | hsa-miR-193a-3p | 11293.88                 |
| hsa-miR-20a     | 5021.5                   | hsa-miR-1255a   | 11699.5                  |
| hsa-miR-335     | 5100.125                 | hsa-let-7i      | 11921.38                 |
| hsa-miR-196a*   | 5142.875                 | hsa-let-7a*     | 12328                    |
| hsa-miR-937     | 5228.5                   | hsa-miR-1274a   | 13028.38                 |
| hsa-miR-1274b   | 5276.875                 | hsa-miR-1827    | 13111.13                 |
| hsa-miR-519e*   | 5305.5                   | hsa-miR-939     | 13863.63                 |
| hsa-miR-20b*    | 5412                     | hsa-miR-19b     | 13894                    |
| hsa-miR-320d    | 5466.25                  | hsa-miR-589     | 13900                    |
| hsa-miR-617     | 5758.5                   | hsa-miR-374a    | 14894                    |
| hsa-miR-1321    | 5809                     | hsa-miR-487b    | 15245.75                 |
| hsa-miR-99b     | 5813.875                 | hsa-let-7g      | 15774.13                 |
| hsa-miR-498     | 5816.75                  | hsa-miR-19a     | 15826                    |
| hsa-miR-30d     | 6084.75                  | hsa-miR-423-3p  | 16433.13                 |
| hsa-miR-103     | 6114.125                 | hsa-miR-93      | 16574.5                  |
| hsa-miR-1201    | 6130.75                  | hsa-let-7d      | 16646.13                 |
| hsa-miR-183*    | 6203.75                  | hsa-miR-665     | 16882                    |
| hsa-miR-25      | 6296.5                   | hsa-miR-519d    | 17082.38                 |
| hsa-miR-31      | 6384.75                  | hsa-miR-181a    | 17753.75                 |
| hsa-miR-130a    | 6586.625                 | hsa-miR-34a     | 17794                    |
| hsa-miR-24-1*   | 6700.375                 | hsa-miR-765     | 17903.38                 |
| hsa-miR-583     | 7005.5                   | hsa-miR-32*     | 18445.25                 |
| hsa-miR-620     | 7011.375                 | hsa-miR-339-5p  | 19122.5                  |
| hsa-miR-891a    | 7151.75                  | hsa-miR-551b    | 19779.5                  |
| hsa-miR-423-5p  | 7485.375                 | hsa-miR-149*    | 20432.88                 |
| hsa-miR-320b    | 7515.375                 | hsa-miR-15a     | 20441.13                 |
| hsa-miR-574-5p  | 7654.375                 | hsa-miR-9*      | 20515.38                 |
| hsa-miR-300     | 8077.125                 | hsa-miR-29b     | 20769.75                 |
| hsa-miR-27a     | 8096.625                 | hsa-miR-221     | 20869                    |
| hsa-miR-600     | 8168.5                   | hsa-miR-143     | 20893                    |
| hsa-miR-340     | 8583.375                 | hsa-miR-361-5p  | 21288.63                 |

| miRNA           | Average Signal Intensity | miRNA          | Average Signal Intensity |
|-----------------|--------------------------|----------------|--------------------------|
| hsa-miR-99a     | 21533.75                 | hsa-miR-9      | 63247.25                 |
| hsa-miR-195     | 23275                    | hsa-miR-1280   | 63345.38                 |
| hsa-miR-138-1*  | 23535.25                 | hsa-miR-34b    | 64496.5                  |
| hsa-miR-768-5p  | 24411.5                  | hsa-miR-933    | 64520.5                  |
| hsa-miR-193b    | 24501.25                 | hsa-miR-21     | 64525.25                 |
| hsa-miR-30c     | 24630.25                 | hsa-miR-16     | 64528.5                  |
| hsa-let-7e      | 27117.13                 | hsa-miR-23a    | 64529.75                 |
| hsa-miR-106a    | 32866.38                 | hsa-miR-22     | 64532.75                 |
| hsa-let-7b      | 35360.13                 | hsa-miR-1246   | 64535.25                 |
| hsa-miR-888*    | 36086                    | hsa-miR-768-3p | 64536.63                 |
| hsa-miR-494     | 37536.63                 | hsa-miR-222    | 64553                    |
| hsa-miR-886-5p  | 40660.5                  | hsa-miR-1285   | 64556.25                 |
| hsa-miR-1265    | 40991.25                 | hsa-let-7f     | 64569.75                 |
| hsa-let-7c      | 41872.75                 | hsa-miR-886-3p | 64575                    |
| hsa-miR-1264    | 42460.38                 | hsa-miR-26b    | 64587.5                  |
| hsa-miR-26a     | 42562                    | hsa-miR-1259   | 64590                    |
| hsa-miR-15b     | 45313.88                 | hsa-miR-720    | 64602.25                 |
| hsa-miR-668     | 49085.75                 | hsa-miR-923    | 64610                    |
| hsa-miR-30b     | 49284.5                  | hsa-miR-550    | 64611.5                  |
| hsa-miR-125a-5p | 54572.13                 | hsa-miR-24     | 64656.5                  |
| hsa-miR-30a     | 54821.25                 | hsa-miR-29a    | 64663.25                 |
| hsa-miR-491-3p  | 54910.25                 | hsa-miR-125b   | 64668.25                 |
| hsa-let-7a      | 57675.5                  | hsa-miR-1308   | 64668.75                 |
| hsa-miR-23b     | 61966.88                 | hsa-miR-1290   | 64669.63                 |
| hsa-miR-100     | 62049.5                  | hsa-miR-1826   | 64675                    |

**Supplemental Table S3:** Relative mRNA expression of selected genes in ischemic samples. Changes in the expression of NFKB, IKB and IL1B genes in ischemic and LNA miR-130a treated brain samples are shown here. Data shown are the mean  $\pm$  SD, n=3.

| <b>Relative mRNA Expression</b> | <b>MCAo untreated</b>               | <b>MCAo LNA™ anti miR-130a treated</b> |
|---------------------------------|-------------------------------------|----------------------------------------|
| <b>NFKB</b>                     | <b>5.76 <math>\pm</math> 0.287</b>  | <b>1.16 <math>\pm</math> 0.112</b>     |
| <b>IKB</b>                      | <b>9.70 <math>\pm</math> 0.314</b>  | <b>5.38 <math>\pm</math> 0.142</b>     |
| <b>IL1B</b>                     | <b>14.11 <math>\pm</math> 0.527</b> | <b>3.87 <math>\pm</math> 0.424</b>     |
| <b>AQP4 M1</b>                  | <b>1.54 <math>\pm</math> 0.087</b>  | <b>4.86 <math>\pm</math> 0.243</b>     |
| <b>miR-130a</b>                 | <b>2.13 <math>\pm</math> 0.201</b>  | <b>0.37 <math>\pm</math> 0.122</b>     |

**Supplemental Fig. S1:** Relative expression of AQP4 M1 promoter. The entire promoter region upstream exon 0 of the AQP4 gene was amplified using specific primers and cloned into a pGL4 promoter-less luciferase vector. The constructs were then transfected into astrocytoma cells and the relative luciferase activity was determined. Data shown are the mean  $\pm$  SD, n=3.

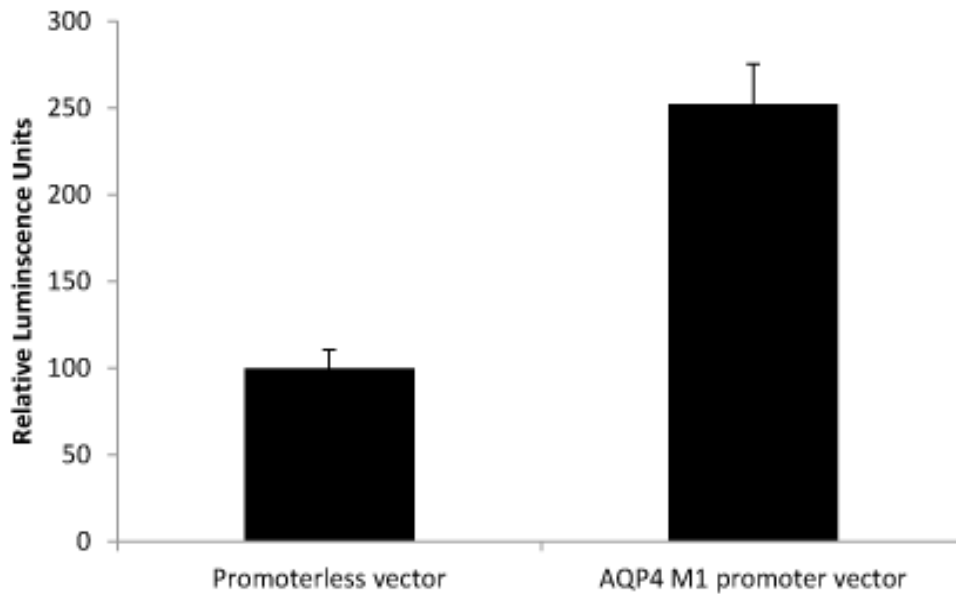

**Supplemental Fig. S2:** Experimentally validated targets of miR-130a. Total RNA extracted from human astrocytoma cells treated with 30 nm anti or pre miR-130a was subjected to mRNA profiling. The oligonucleotide array was performed according to the manufacturer's protocol using 500 ng of total RNA (Illumina, SanDiego, USA) Signal Log ratio of experimentally validated targets of miR-130a was extracted from the mRNA profiling data.

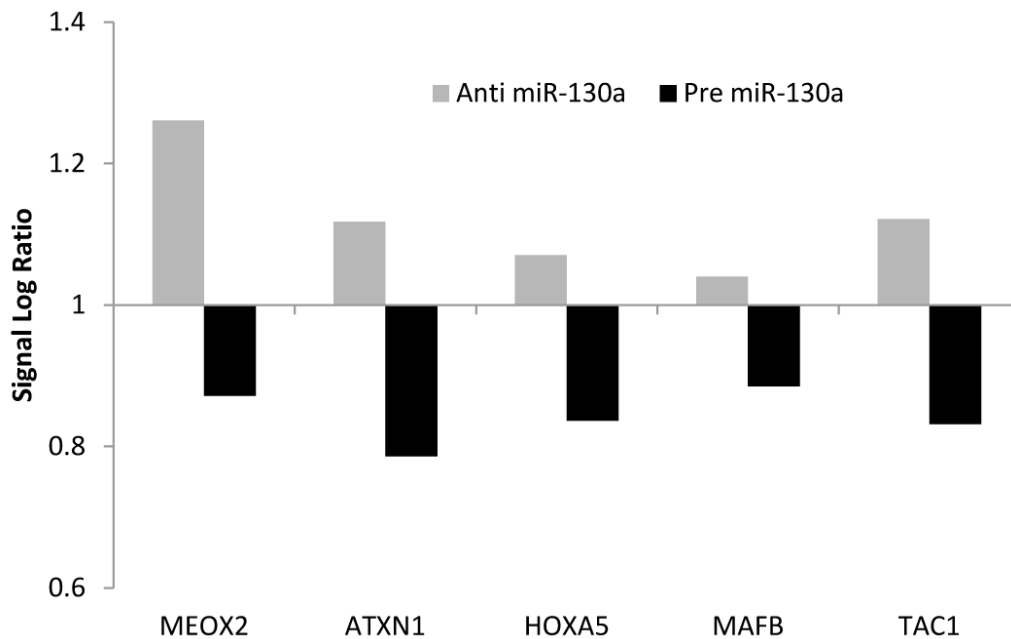



**Supplemental Fig. S3:** Relative AQP4 and miR-130a expression. Astrocytoma cells grown in complete medium supplemented with 10% FBS was replaced with serum free media. Total RNA was extracted and changes in AQP4 and miR-130a expression were determined by qPCR and stem-loop qPCR respectively. Data shown are the mean  $\pm$  SD, n=3.

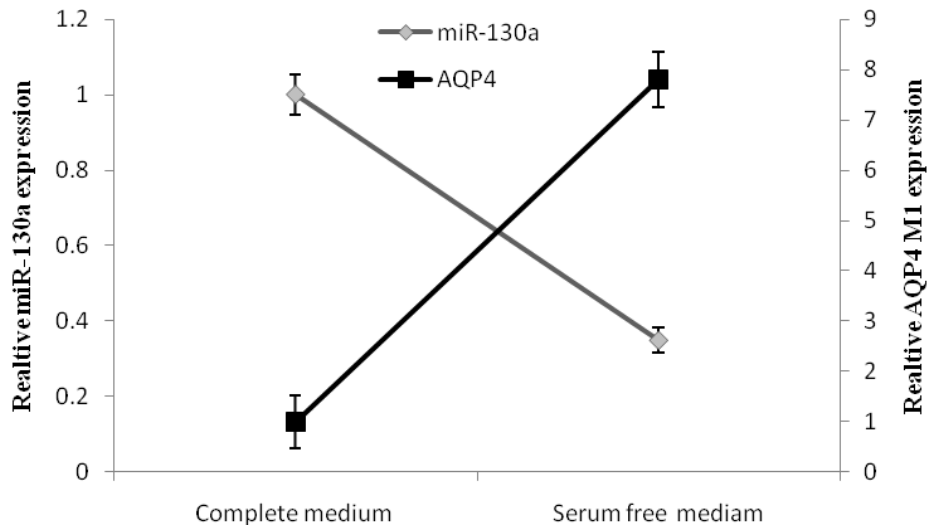

**Supplemental Fig. S4:** Promoter constructs of AQP4 M1. The luciferase reporter constructs containing the flanking regions of the promoter of AQP4 M1 are shown above. The constructs contain the suppressor region postulated by Umenishi et al. (21). This region consists of the miR-130a recognition site flanked by two E-boxes. The predicted recognition site of miR-939 was not taken into consideration as these constructs were transfected into HeLa cells which do not express miR-939. The graph on the left shows an increase in promoter activity as miR-130a sites are mutated or deleted. As expected, an increase in activity was also noted when the E2 region was deleted. The graph on the right shows the effect of miR-130a modulation on these promoter constructs. The extent of modulation was determined by normalizing the luminescence readings against the promoter activity of the respective constructs. Luciferase luminescence readings were obtained 48 h post transfection. Statistical analyses were done using t-tests \*\*,  $p < 0.01$ , compared to respective controls. Data shown are the mean  $\pm$  SD,  $n=3$ .

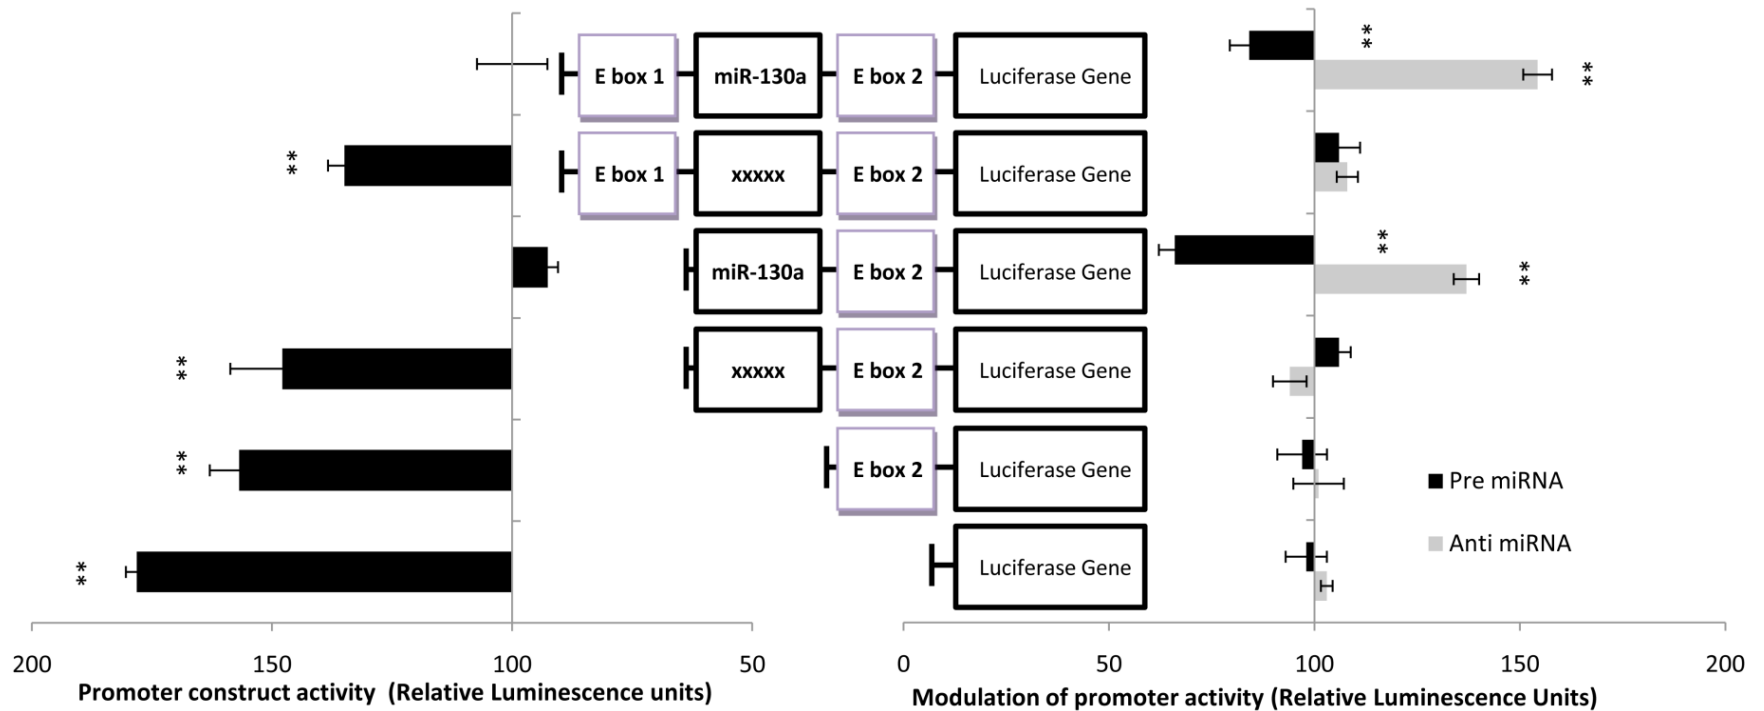

**Supplemental Fig. S5:** Relative IL1B, AQP4 M1 and miR-130a expression. Astrocytoma cells grown in complete medium were treated with IL1B antibodies at a concentration of 15nM for a period of 1 h before transfection of anti or pre miR-130a. Total RNA was extracted 48 h post transfection and changes in IL1B, AQP4 and miR-130a expression were determined by qPCR and stem-loop qPCR respectively. Data shown are the mean  $\pm$  SD, n=3.

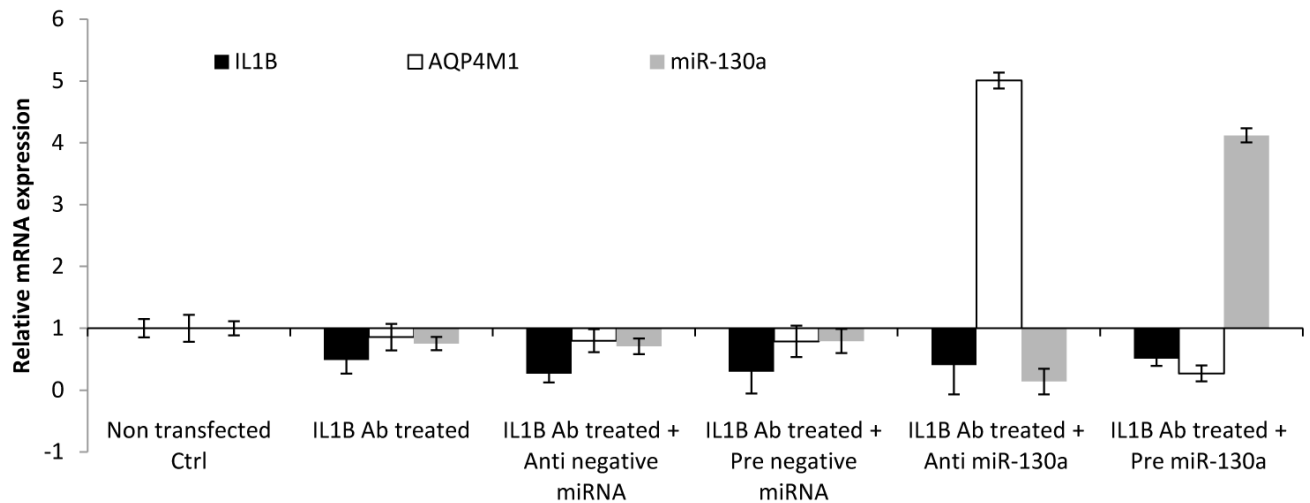

Supplement: supp_M111.280701_jbc.M111.280701-1.pdf [file supp_M111.280701_jbc.M111.280701-1.pdf]
